# Supplementary material for: In Silico, In Vitro, and Pharmacokinetic Studies of UBMC-4, a Potential Novel Compound for Treating against Trypanosoma cruzi
Source: MDPI journal article supplement (doi:10.3390/pathogens11060616), 2022-05-24
Supplement: s1 [file s1]

## Supplementary Information

### 1. Absorption spectrum of UBMC-4

UBMC-4's absorption spectrum was evaluated over a wavelength range from 200 nm to 700 nm. Maximal absorption was observed in the region from 300 nm to 350 nm.

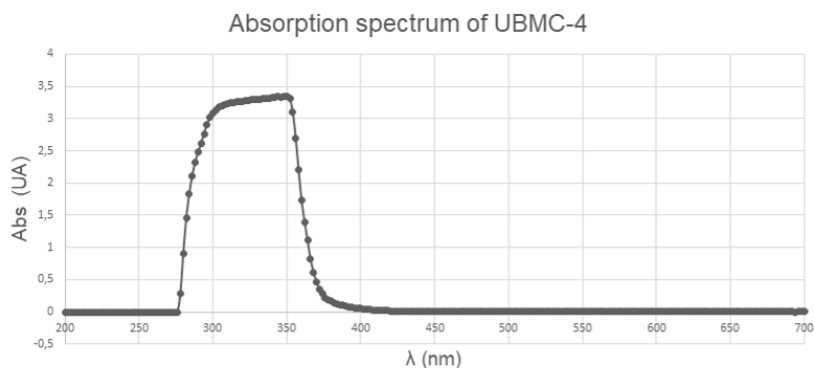

**Figure S1.** Absorption spectrum of UBMC-4.

### 2. HPLC method

A reverse-phase HPLC method was developed to quantify UBMC-4 in mice plasma.

Column: C18

λ: 300 nm

T: 40°C

Total time: 13 min

Mobile phase:

**Table S1.** Gradient HPLC method

| Time (min) | A (%) | B (%) | C (%) | Flow (mL/min) |
|------------|-------|-------|-------|---------------|
| 0          | 30    | 40    | 30    | 1.0           |
| 6          | 30    | 40    | 30    | 1.0           |
| 7          | 20    | 0     | 80    | 1.0           |
| 10         | 20    | 0     | 80    | 1.0           |
| 11         | 30    | 40    | 30    | 1.0           |

Where, A: Acetonitrile (0.1% TFA) – B: Water (0.1% TFA) – C: Methanol

## 2.1 Calibration curve

**Table S2.** Calibration curve of UBMC-4.

| Compound | Level | Retention time | Quantity | Area       | Height   |
|----------|-------|----------------|----------|------------|----------|
| UBMC-4   | 1     | 10,8233        | 20       | 2.074,2031 | 429,0315 |
|          |       | 10,8267        |          | 2.105,1440 | 436,7761 |
|          |       | 10,8333        |          | 2.052,8533 | 430,0585 |
|          | 2     | 10,8233        | 10       | 1.157,3251 | 242,6668 |
|          |       | 10,8317        |          | 1.153,5895 | 244,4369 |
|          |       | 10,8283        |          | 1.172,1451 | 243,3595 |
|          | 3     | 10,8150        | 5        | 1.025,7137 | 213,6284 |
|          |       | 10,8267        |          | 1.039,2709 | 219,8506 |
|          |       | 10,8283        |          | 1.046,6154 | 213,7983 |
|          | 4     | 10,8150        | 2        | 239,3912   | 49,0692  |
|          |       | 10,8283        |          | 249,8886   | 52,5522  |
|          |       | 10,8183        |          | 242,8956   | 51,1904  |
|          | 5     | 10,8250        | 1        | 84,5370    | 16,5988  |
|          |       | 10,8283        |          | 130,2286   | 27,3586  |
|          |       | 10,8267        |          | 28,3791    | 5,1623   |
|          | 6     | 10,8233        | 0,5      | 51,5323    | 10,3720  |
|          |       | 10,8200        |          | 62,9588    | 11,6813  |

Equation:  $Y=111.19946 \cdot X$

$R^2 = 0.96985$

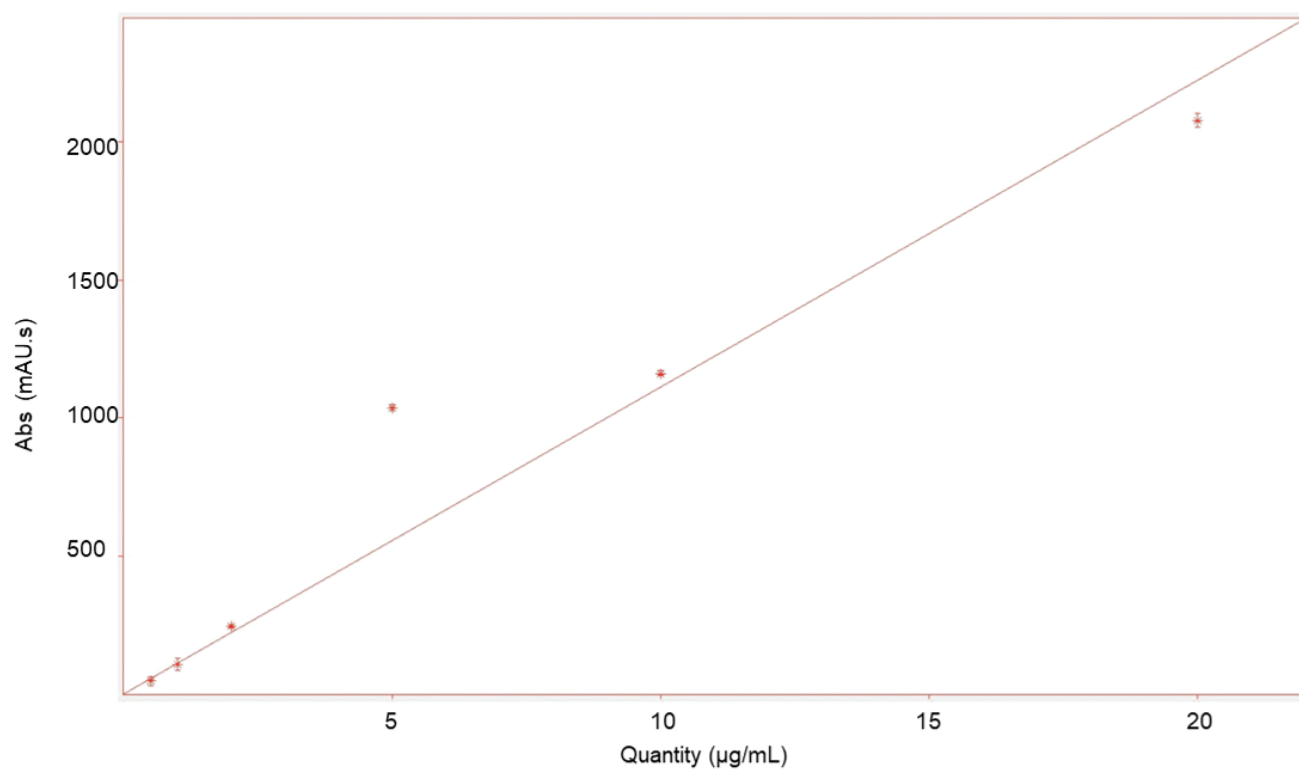

**Figure S2.** Calibration curve of UBMC-4.

## 2.2 Selectivity

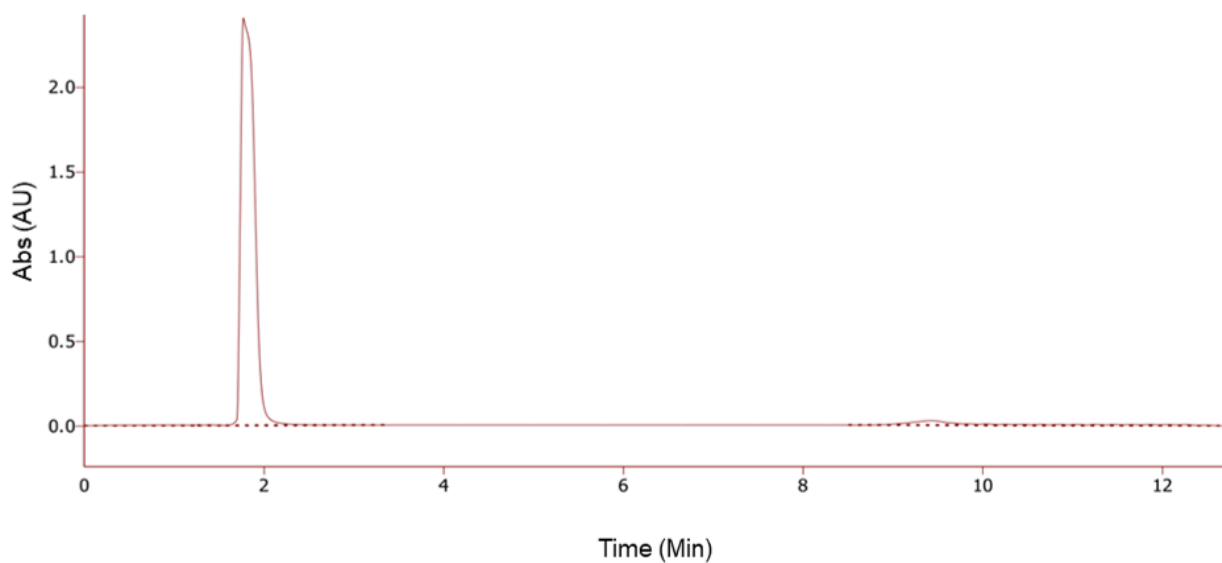

**Figure S3-A.** HPLC method selectivity. Mouse plasma + vehicle chromatogram. No peaks were observed.

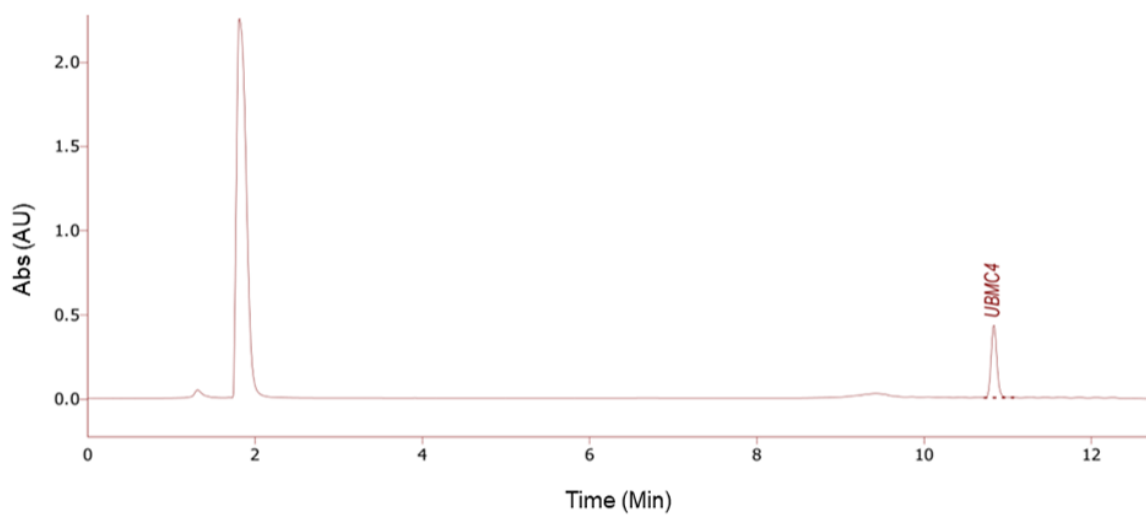

**Figure S3-B** HPLC method selectivity. Mouse plasma + vehicle + 0.1 mg/mL UBMC-4 chromatogram. Resolved peak corresponding to UBMC-4.
